# Supplementary material
Source: PubMed Central journal article supplement (PMC2478731)
Supplement: 97320630002330S1.pdf [file 97320630002330S1.pdf]

## Supplementary material

| microRNAs                | Targets     | Cancer types                                                                                      |
|--------------------------|-------------|---------------------------------------------------------------------------------------------------|
| <b>Oncogenes</b>         |             |                                                                                                   |
| miR-221/222              | cKIT        | Papillary thyroid cancer; glioblastoma                                                            |
| miR-372-373              | LATS2       | Germ cell tumors                                                                                  |
| miR-191                  | Unknown     | Colorectal cancer; non-small cell lung cancer; pancreatic cancer; stomach cancer; prostate cancer |
| miR-17-92                | RAS         | Non-small cell lung cancer                                                                        |
| Let-7                    | MYC         | Lung cancer                                                                                       |
| BIC/miR155               | AT1R        | B-cell lymphoma, breast, colon, lung and thyroid                                                  |
| <b>Tumor suppressors</b> |             |                                                                                                   |
| miR-15a/16               | BCL-2       | Chronic lymphocytic leukemia (B cell); pituitary tumors                                           |
| miR-143/145              | ERK5; MAPK7 | Colorectal cancer; breast cancer                                                                  |
| miR-125b                 | Unknown     | Breast cancer                                                                                     |
| miR-106a                 | RB-1        | Colorectal cancer; pancreatic cancer; prostate cancer                                             |

**Table 1:** Role of miRNAs as oncogene and tumor suppressors with their cancer association.
